# Supplementary figures and images for: Effects of number of parallel runs and frequency of bias-strength replacement in generalized ensemble molecular dynamics simulations
Source: PeerJ journal article supplement (doi:10.7717/peerj-pchem.4), 2019-10-15

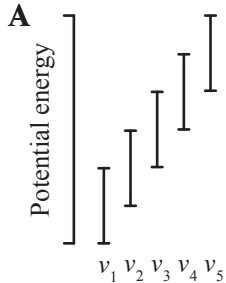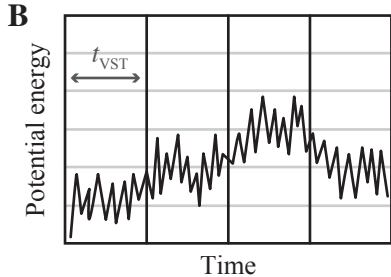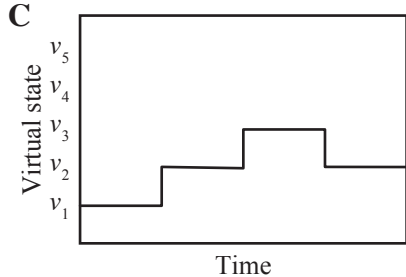

Supplement: Figure_s01.pdf [file Figure_s01.pdf]

**A**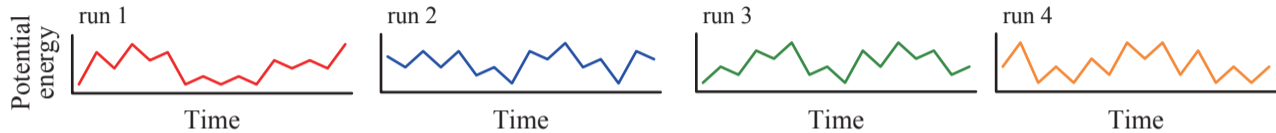**B**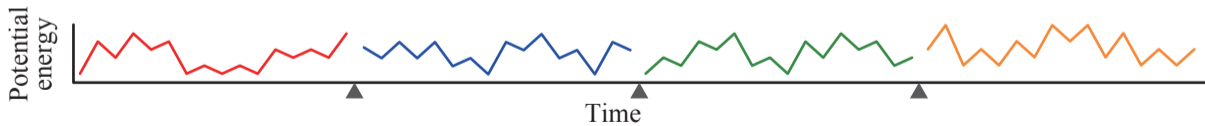

Supplement: Figure_s02.pdf [file Figure_s02.pdf]
